# Supplementary material for: Selenium supplementation inhibits IGF-1 signaling and confers methionine restriction-like healthspan benefits to mice
Source: eLife. 2021 Mar 30;10:e62483. doi: 10.7554/eLife.62483 (PMC8009673; doi:10.7554/eLife.62483)
Supplement: Supplementary file 1. [file elife-62483-supp1.xlsx]

## Sheet: Sheet1
	Diet 1 (CF)		Diet 2 (MR)		Diet 3 (CF-SS)		Diet 4 (CF-SM)		Diet 5 (CF-SM 2X)
	g%	kcal%	g%	kcal%	g%	kcal%	g%	kcal%	g%	kcal%
Protein	15	12	15	12	15	12	15	12	15	12
Carbohydrate	41	31	41	31	41	31	41	31	41	31
Fat	34	57	34	57	34	57	34	57	34	57
Total	100	100	100	100	100	100	100	100	100	100
kcal/g		5.3		5.3		5.3		5.3		5.3
Ingredient	g	kcal	g	kcal	g	kcal	g	kcal	g	kcal
L-Arginine	11.2	45	11.2	45	11.2	45	11.2	45	11.2	45
L-Histidine-HCl-H2O	3.3	13	3.3	13	3.3	13	3.3	13	3.3	13
L-Isoleucine	8.2	33	8.2	33	8.2	33	8.2	33	8.2	33
L-Leucine	11.1	44	11.1	44	11.1	44	11.1	44	11.1	44
L-Lysine	14.4	58	14.4	58	14.4	58	14.4	58	14.4	58
DL-Methionine	8.86	35	1.24	5	8.86	35	8.86	35	8.86	35
L-Phenylalanine	11.6	46	11.6	46	11.6	46	11.6	46	11.6	46
L-Threonine	8.2	33	8.2	33	8.2	33	8.2	33	8.2	33
L-Tryptophan	1.8	7	1.8	7	1.8	7	1.8	7	1.8	7
L-Valine	8.2	33	8.2	33	8.2	33	8.2	33	8.2	33
L-Glutamic Acid	27.83	111	35.5	142	27.83	111	27.83	111	27.83	111
Glycine	23.3	93	23.3	93	23.3	93	23.3	93	23.3	93
L-Selenomethionine	0	0	0	0	0	0	0.033	0	0.066	0
Sodium Selenite	0	0	0	0	0.066	0	0	0	0	0
Corn Starch	35	140	35	140	35	140	35	140	35	140
Maltodextrin	125	500	125	500	125	500	125	500	125	500
Dextrose	50	200	50	200	50	200	50	200	50	200
Sucrose	150	600	150	600	150	600	150	600	150	600
Cellulose	50	0	50	0	50	0	50	0	50	0
Corn Oil	46	414	46	414	46	414	46	414	46	414
Lard	257	2313	257	2313	257	2313	257	2313	257	2313
Mineral Mix S10001	35	0	35	0	35	0	35	0	35	0
Vitamin Mix V10001	10	40	10	40	10	40	10	40	10	40
Choline Bitartrate	2	0	2	0	2	0	2	0	2	0
Dye	0.05	0	0.05	0	0.05	0	0.05	0	0.05	0
Total	898	4759	898	4759	898	4759	898	4759	898	4759
